# Supplementary material
Source: publisher site journal article supplement (https://www.dovepress.com/article/399687)
Supplement: Supplementary file 1 [file get_supplementary_file.php]

**Appendix I: Interview Guide**

ID: ………………………….. Role: **………………………**

**Section I: Socio-Demographic Characteristics (Optional)**

1. Age of respondent [__ __] Years

2. Marital status: i. Single ii. Married iii. Separated iv. Divorced

v. Widowed vi. Cohabitation

3. Education level: i. Primary ii. Secondary level iii. Tertiary iv. No formal education

4. Religion (optional): i. Christian ii. Muslim iii. Traditional

iv. Other (specify)…...............

**Section II: Disease burden at the beginning of the pandemic**

5. How did you live or experience the COVID-19 situation when it first appeared in the area?

*(Probe)* when you first encountered or heard of the disease, before you had heard that it was COVID-19?

How did you experience the first suspects/cases? How does different type of shocks affect communities?

6. When you saw/heard the symptomatic case, how did it feel for your safety?

**Section III: Perceived social risk of** **COVID-19 pandemic**

7. How did you respond to the COVID-19 pandemic, and how was the response compared to the previous outbreaks? Probe for issues of food insecurity, economic hardships, social support especially for the community people, inability to access health care and the like, the panic, impulse buying, the fear of the unknown, domestic violence, depression, stress, anxiety, anger.

In what ways is the health facility in your community capable of managing COVID-19? What

was your experience during the COVID-19 outbreak?

**Section IV: Perceived psychological risk** **of** **COVID-19 pandemic,** *that is ways in which the impact of COVID-19 pandemic has negatively affected social aspects of life (interactions and relationships).* [Health care providers and support staff (laboratory personnel, nurses, doctors, cleaners, drivers, security personnel)]:

With the onset of COVID-19, describe your current daily routine. *Probe for: What has changed from his /her routine before COVID-19?*

How has the contact tracing, case testing, and eventual hospitalization of COVID-19 patients at this health facility negatively affected your social life in terms of interactions and relationships? *Probe for what negative changes have occurred in relation to roles, power relations, cohesion in the social interactions and relationships at these different levels namely, family, work, and the community where they live.*

In what ways has COVID-19 affected your quality of life in terms of comfort and happiness as experienced by you as an individual?

**Section V: Copying and prospects of improved management of future pandemics**

Coping with the situation of the COVID-19 pandemic?

What would be the best way of communicating the COVID-19 outbreak in your community?

(Probe) How can epidemic awareness be improved in your community?
